# Supplementary material for: Systemic osteoprotective effects of Epimedii Folium and Ligustri Lucidi Fructus in senile osteoporosis rats by promoting the osteoblastogenesis and osteoclastogenesis based on MLP-ANN model
Source: Springer Nature journal article supplement (doi:10.1186/s13020-020-00368-0), 2020-08-20
Supplement: MOESM1 [file 18302078]

— 權重值 > 0  
— 權重值 < 0

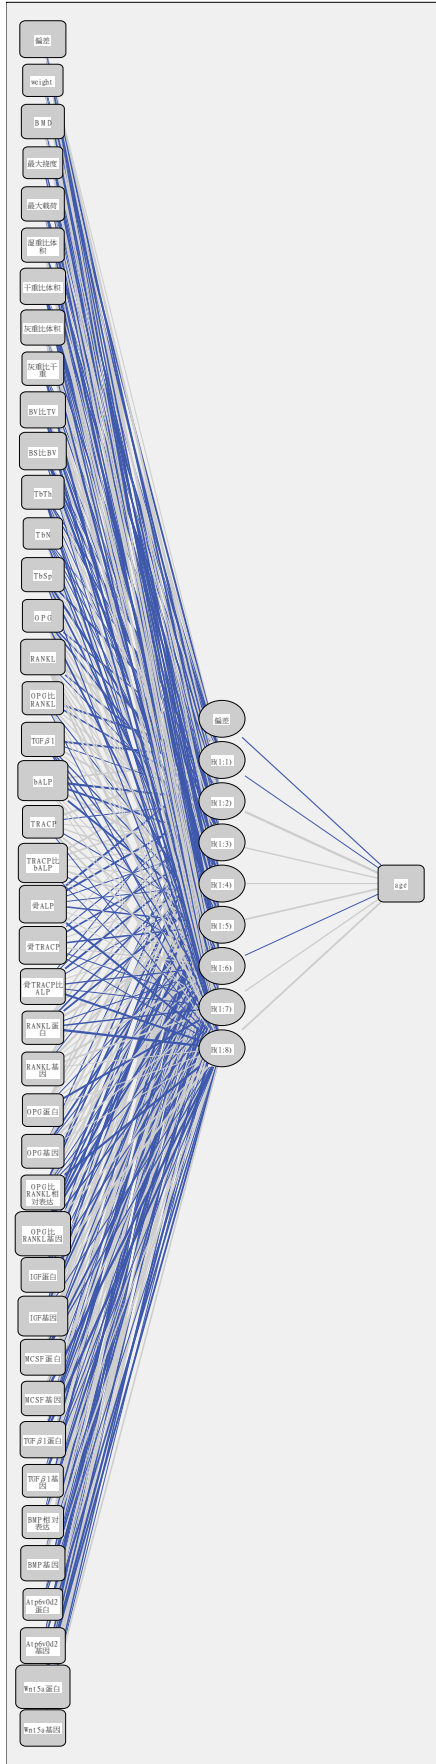

隱藏層激活函數：雙曲正切  
輸出層激活函數：恆等

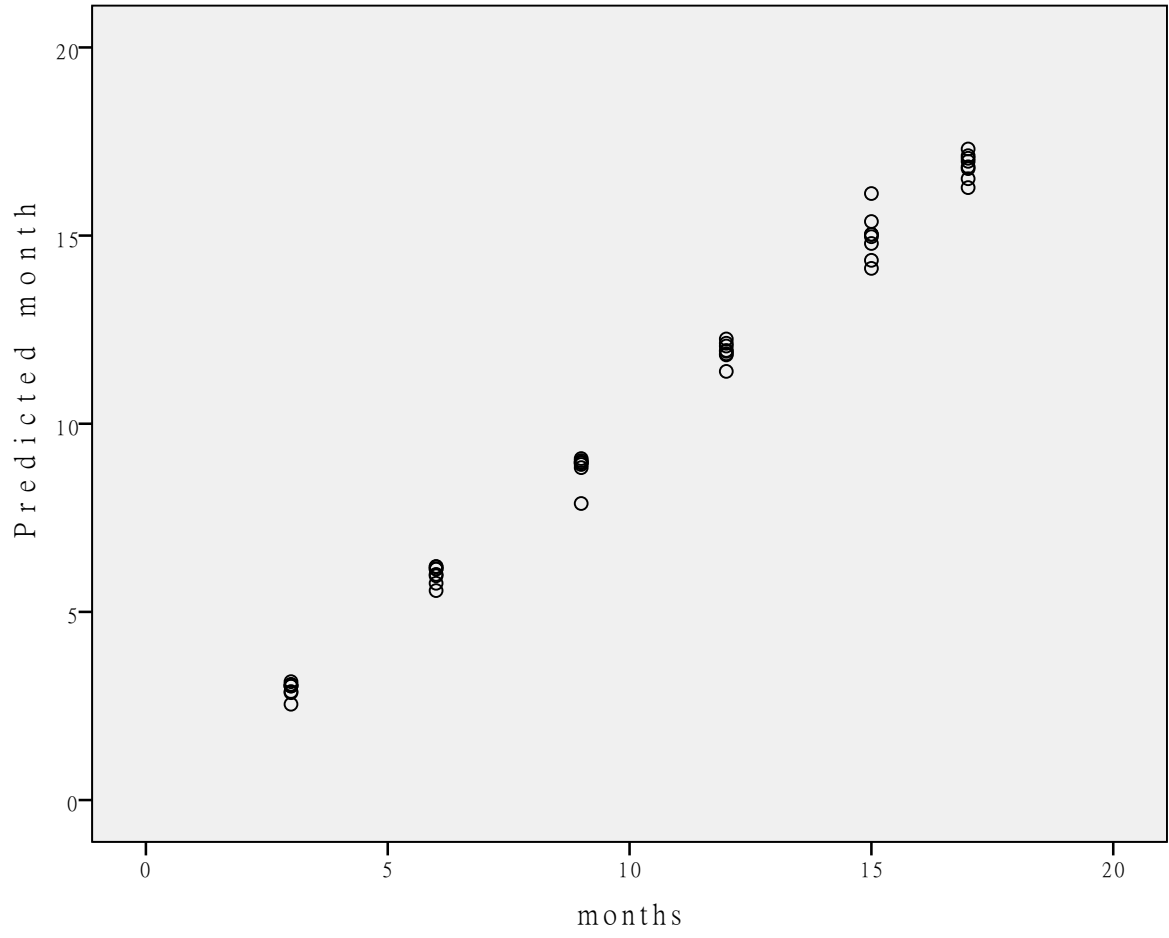

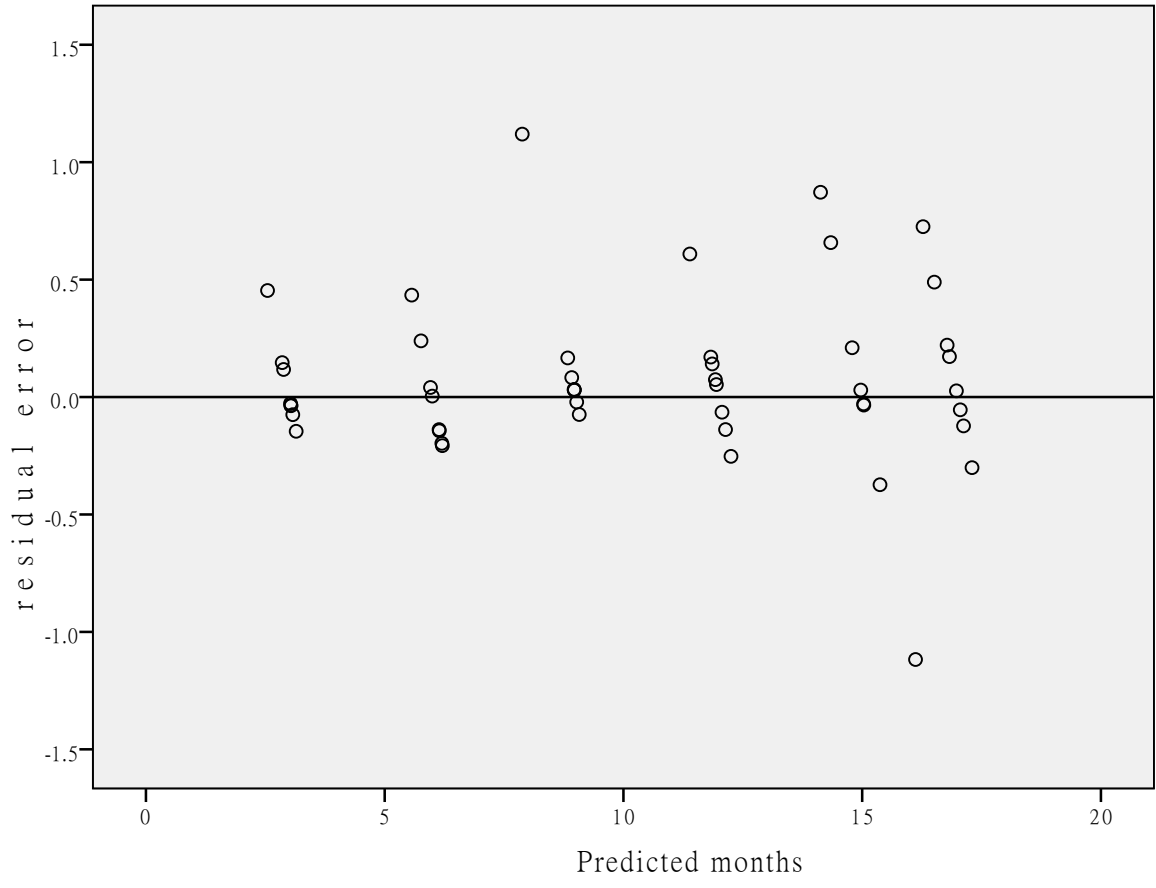

自变量的重要性

|                        | 重要性  | 标准化的重要性 |
|------------------------|------|---------|
| body weight            | .012 | 18.8%   |
| BMD                    | .021 | 33.3%   |
| Ultimate deflection    | .010 | 15.7%   |
| Maximal load           | .020 | 32.8%   |
| Wet weight/volume      | .020 | 32.0%   |
| Dry weight/volume      | .029 | 45.9%   |
| Asht weight/volume     | .024 | 38.7%   |
| ash weight/dry weight  | .016 | 26.4%   |
| BV/TV                  | .028 | 44.9%   |
| BS/BV                  | .034 | 54.0%   |
| Tb.Th                  | .019 | 29.9%   |
| Tb.N                   | .008 | 13.0%   |
| Tb.Sp                  | .020 | 31.4%   |
| Serum OPG              | .014 | 21.9%   |
| Serum RANKL            | .026 | 40.9%   |
| Serum OPG/RANKL        | .015 | 24.3%   |
| Serum TGF- $\beta$ 1   | .020 | 31.8%   |
| Serum bALP             | .044 | 71.2%   |
| Serum TRACP            | .013 | 21.0%   |
| Serum bALP/TRACP       | .041 | 66.1%   |
| ALP                    | .034 | 54.8%   |
| TRACP                  | .035 | 55.8%   |
| ALP/TRACP              | .027 | 42.9%   |
| RANKL protein          | .016 | 25.7%   |
| RANKL mRNA             | .018 | 28.7%   |
| OPG protein            | .013 | 21.6%   |
| OPG mRNA               | .018 | 29.4%   |
| OPG/RANKL protein      | .023 | 36.8%   |
| OPG/RANKL mRNA         | .062 | 100.0%  |
| IGF-1 protein          | .022 | 35.9%   |
| IGF-1 mRNA             | .044 | 69.9%   |
| M-CSF protein          | .027 | 43.1%   |
| M-CSF mRNA             | .021 | 33.2%   |
| TGF- $\beta$ 1 protein | .029 | 46.2%   |
| TGF- $\beta$ 1 mRNA    | .014 | 22.0%   |
| BMP-2 protein          | .015 | 23.9%   |
| BMP-2 mRNA             | .025 | 39.7%   |
| Atp6v0d2 protein       | .010 | 15.4%   |
| Atp6v0d2 mRNA          | .027 | 43.5%   |
| Wnt5a protein          | .059 | 94.5%   |
| Wnt5a mRNA             | .029 | 46.9%   |
